# Supplementary material
Source: publisher figshare collection journal article supplement (https://springernature.figshare.com/ndownloader/files/14386745)

**Additional file 4:** PCR amplification of *CmLOX08* full length promoter.

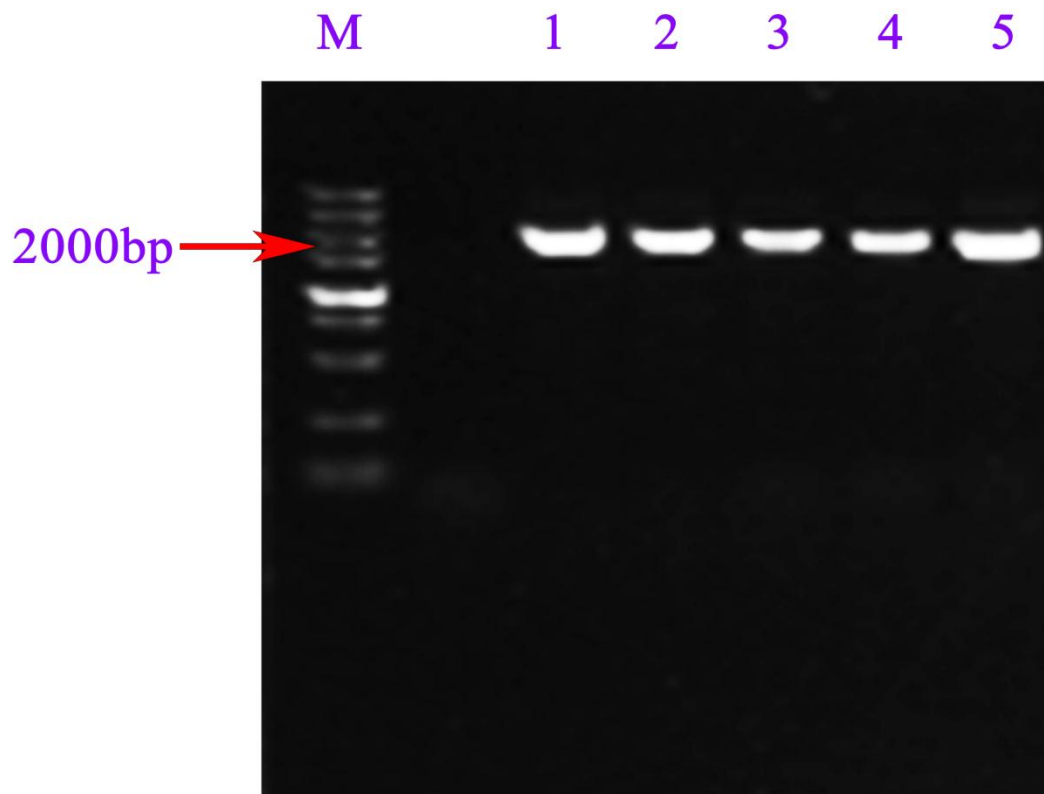

Supplement: Supplementary file [file 14386745]
